# Supplementary material for: Improvement of Aerosol Filtering Performance of PLLA/PAN Composite Fiber with Gradient Structure
Source: MDPI journal article supplement (doi:10.3390/nano12224087), 2022-11-20
Supplement: s1 [file s1]

## Supplementary Materials

# Improvement of Aerosol Filtering Performance of PLLA/PAN Composite Fiber with Gradient Structure

Ping Zhu \*, Wang Sun and Yunchun Liu

School of Instruments and Electronics, North University of China, Taiyuan 030051, China

\* Correspondence: h.zhuping@163.com; Tel.: +86-03513922540

**Table S1.** Stress-strain curves of fibrous membrane

|              | PLLA  | PAN   | PLLA/PAN |
|--------------|-------|-------|----------|
| Strain (%)   | 20.52 | 56.17 | 65.34    |
| Stress (MPa) | 6.29  | 9.34  | 11.76    |
